# Supplementary material for: Effect of Structured Phenolic Lipids with EPA/DHA and Gallic Acid against Metabolic-Associated Fatty Liver Disease (MAFLD) in Mice
Source: MDPI journal article supplement (doi:10.3390/molecules27227702), 2022-11-09
Supplement: s1 [file s1]

## Supplementary Materials

### *Optimization of the acidolysis process for obtaining sPAG by RSM*

Table S1 shows the process variables optimization for obtaining sPAG with EPA, DHA, and EPA+DHA (g/100 g TFA) and phenolic acidolysis (%).

**Table S1:** Optimal values of the independent variables SC pressure and SC temperature to maximize the responses EPA, DHA and EPA+DHA content (g/100 g TFA), sPAG synthesis (%) and the joint optimization of all the variables.

| Optimization       | Supercritical temperature (°C) | Supercritical pressure (bar) | Stationary point | Optimal predicted value |
|--------------------|--------------------------------|------------------------------|------------------|-------------------------|
| EPA                | 80                             | 300                          | Maximum          | 11.76                   |
| DHA                | 80                             | 300                          |                  | 8.67                    |
| EPA+DHA            | 80                             | 300                          |                  | 20.44                   |
| sPAG synthesis     | 80                             | 78                           |                  | 32.24                   |
| Joint optimization | 80.0                           | 78.0                         | Maximum          | EPA: 11.15              |
|                    |                                |                              |                  | DHA: 8.38               |
|                    |                                |                              |                  | EPA+DHA: 19.53          |
|                    |                                |                              |                  | sPAG synthesis: 32.24   |

### *Identification of DRCSO, n-3 PUFAC and sPAG by TLC.*

All the samples were identified by TLC on Silica gel 60 F254 plates (Merck). A solution of chloroform, acetone, and glacial acetic acid (96/4/1, v/v/v, respectively) was used as eluent. [1] The elution order on the chromatographic plate from bottom to top was produced according to their decreasing polarity: MG, DG, and TG [2]. In order to visualize the lipid structures, the plates were stained with iodine solution.

### *Thin-Layer Chromatography (TLC) of optimal validated sPAG*

TLC separation of purified and non-purified sPAG is shown in Figure S1. The presence of products resulting from enzymatic acidolysis reactions with gallic acid under CO<sub>2</sub>SC conditions (i.e., monoglycerols (MG), diacylglycerols (DG), triacylglycerols (TG), phenolic monoglycerols and phenolic diacylglycerols) were observed according to the polarity degree [3]. As expected, MG molecules migrated the least, while TG molecules migrated the fastest, according to previous research [4]. The phenolic compounds, corresponding to sPAG monoglycerols and sPAG diacylglycerols migrated slower than their corresponding triacylglycerols [1] and the gallic acid standard did not elute probably due to its high polarity. TLC analysis confirmed the presence of sPAG in bands C-F (non-purified) and G (purified), also showing that purification with NaOH removes a part of MG and phenolic MG. The elution order observed in DRCSO showed that FA are predominantly found in the form of TG in DRCSO, characteristic of refined oils.

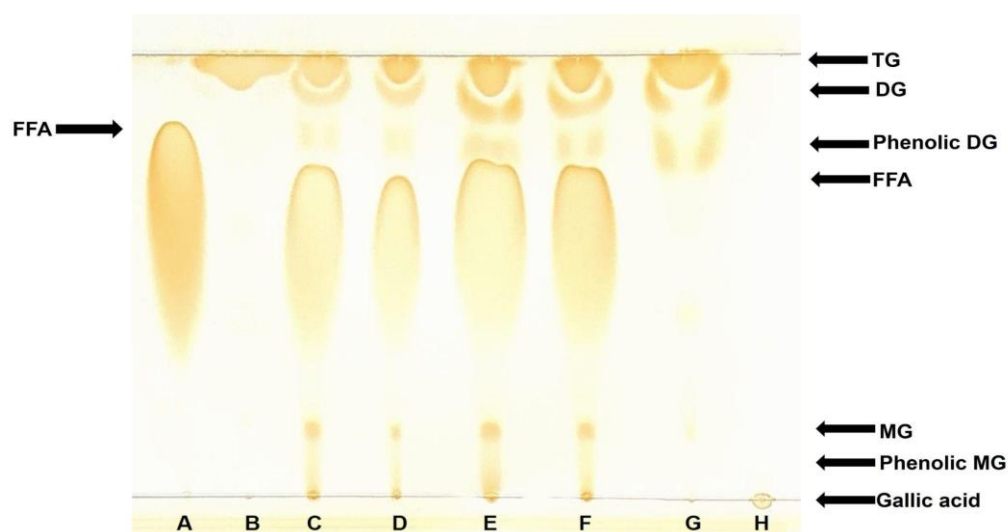

**Figure S1:** Thin-layer chromatography separation: (A) free fatty acids standard, (B) DRCISO, (C–F) sPAG non purified, (G) sPAG purified and (H) gallic acid standard.

## References:

- [1] Sabally, K.; Karboune, S.; St-Louis, R.; Kermasha, S. Lipase-catalyzed transesterification of dihydrocaffeic acid with flaxseed oil for the synthesis of phenolic lipids. *J. Biotechnol.* **2006**, *127*, 167–176. <https://doi.org/10.1016/j.jbiotec.2006.06.010>.
- [2] Wanasundara, U. N. and Shahidi, F. Positional distribution of fatty acids in triacylglycerols of seal blubber oil. *J. food lipids.* **1997**, *4*, 51–64. <https://doi.org/10.1111/j.1745-4522.1997.tb00080.x>.
- [3] Dovale-Rosabal, G.; Rodríguez, A.; Espinosa, A.; Barriga, A.; Aubourg, S.P. Synthesis of EPA- and DHA-enriched structured acylglycerols at the *sn*-2 position starting from commercial salmon oil by enzymatic lipase catalysis under supercritical conditions. *Molecules* **2021**, *26*, 3094. <https://doi.org/10.3390/molecules26113094>.
- [4] Haq, M.; Park, S. K.; Kim, M. J.; Cho, Y. J. and Chun, B. S. Modifications of Atlantic salmon by-product oil for obtaining different  $\omega$ -3 polyunsaturated fatty acids concentrates: An approach to comparative analysis. *J. Food Drug Anal.* **2018**, *26*, 545–556. <https://doi.org/10.1016/j.jfda.2017.05.006>.
